# Supplementary material for: Columnar discotic Pt(ii) metallomesogens as luminescence multifunctional materials with chemo and thermosensor abilities
Source: Royal Society of Chemistry journal article supplement (doi:10.1039/c4tc01666a), 2014-01-01
Supplement: c4tc01666a1.pdf [file c4tc01666a1.pdf]

## **Electronic Supplementary Information**

### **Columnar discotic Pt(II) metallomesogens as luminescence multifunctional materials with chemo and thermosensor abilities**

Cristián Cuerva<sup>a</sup>, José A. Campo<sup>a</sup>, Paloma Ovejero<sup>a</sup>, M. Rosario Torres<sup>b</sup>, Elisabete Oliveira<sup>c,d</sup>, Sérgio M. Santos<sup>e</sup>, Carlos Lodeiro<sup>\*c,d</sup> and Mercedes Cano<sup>\*a</sup>

<sup>a</sup> Departamento de Química Inorgánica I, Facultad de Ciencias Químicas, Universidad Complutense, E-28040 Madrid, Spain. <sup>b</sup> Laboratorio de Difracción de Rayos-X, Facultad de Ciencias Químicas, Universidad Complutense, E-28040 Madrid, Spain. <sup>c</sup> BIOSCOPE Group, REQUIMTE, Chemistry Department, Faculty of Science and Technology, University NOVA of Lisbon 2829-516 Monte da Caparica, Portugal. <sup>d</sup> ProteoMass Scientific Society, Rua dos Inventores, Madan Park, 2825-182 Caparica, Portugal. <sup>e</sup> Department of Chemistry and CICECO, University of Aveiro, Campus de Santiago, 3810-193 Aveiro, Portugal.

E-mail: <sup>a</sup> [mmcano@ucm.es](mailto:mmcano@ucm.es),

<sup>c,d</sup> [cle@fct.unl.pt](mailto:cle@fct.unl.pt)

**Table S1.** Selected bond distances (Å) and angles (°) for [Pt(pz<sup>R(8,8)py</sup>)<sub>2</sub>] **b8**.

|         |           |              |          |
|---------|-----------|--------------|----------|
| Pt – N1 | 1.975(9)  | N1 – Pt – N3 | 79.6(4)  |
| Pt – N3 | 2.033(9)  | N1 – Pt – N4 | 179.0(4) |
| Pt – N3 | 1.976(10) | N1 – Pt – N6 | 100.2(4) |
| Pt – N3 | 2.018(9)  | N3 – Pt – N4 | 99.5(4)  |
|         |           | N3 – Pt – N6 | 179.5(4) |
|         |           | N4 – Pt – N6 | 80.8(4)  |

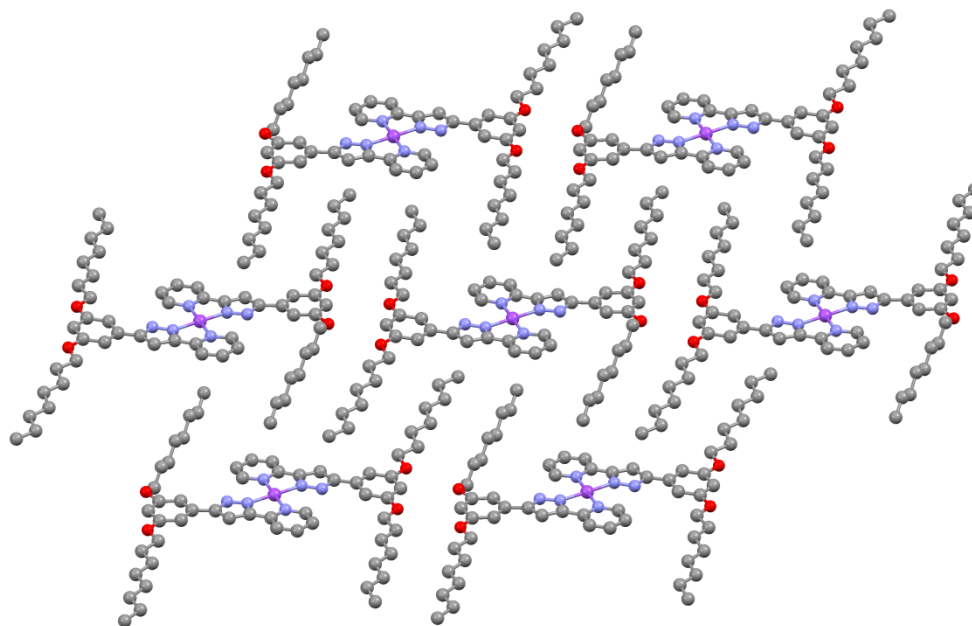

**Figure S1.** Packing of [Pt(pz<sup>R(8,8)py</sup>)<sub>2</sub>] **b8** in the *bc* plane showing high interdigitation

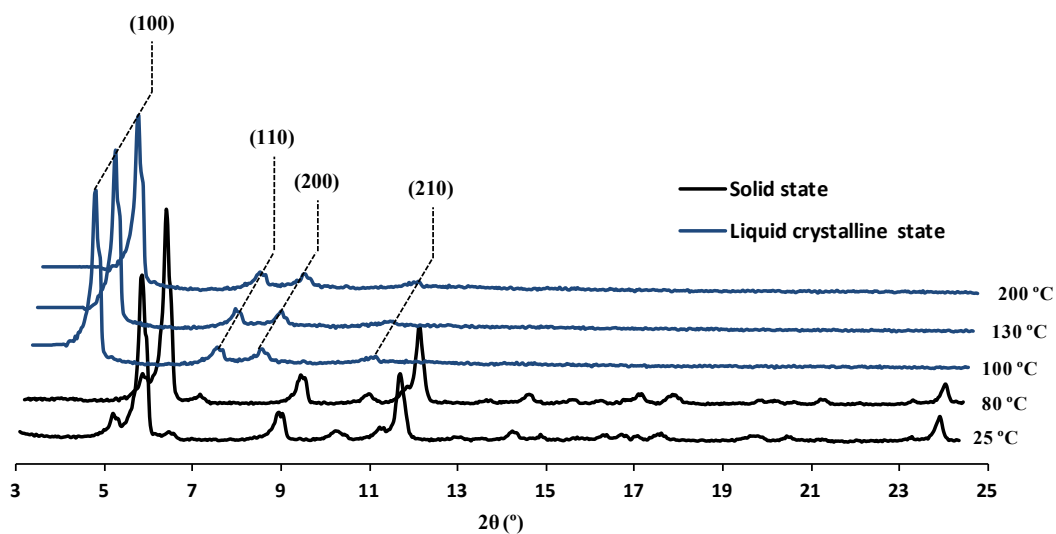

**Figure S2.** Powder XRD diffraction pattern for Pt(II) compound **b12** on heating

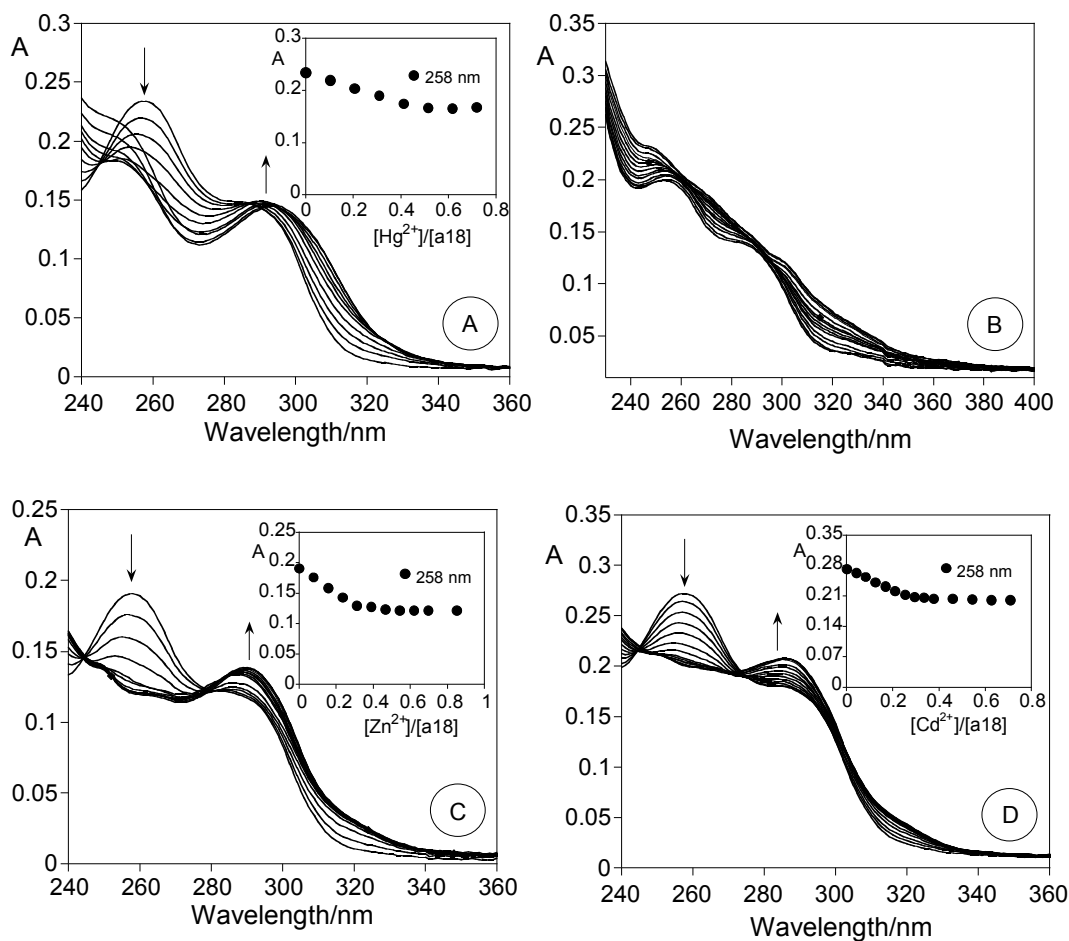

**Figure S3.** Absorption spectra titrations for  $[\text{Hpz}^{\text{R}(18,18)\text{py}}] \mathbf{a18}$  in  $\text{CH}_2\text{Cl}_2$  solution ( $1 \times 10^{-5} \text{ M}$ ,  $\lambda_{\text{exc}} = 286 \text{ nm}$ ) as a function of increasing amounts of  $\text{Hg}(\text{NO}_3)_2$  (A),  $[\text{Pd}(\text{CH}_3\text{CN})_4][\text{BF}_4]_2$  (B),  $\text{Zn}(\text{BF}_4)_2$  (C) and  $\text{Cd}(\text{CF}_3\text{SO}_3)_2$  (D). Insets show the absorption read as a function of  $[\text{Hg}^{2+}]/[\mathbf{a18}]$  (A),  $[\text{Zn}^{2+}]/[\mathbf{a18}]$  (C) and  $[\text{Cd}^{2+}]/[\mathbf{a18}]$  (D).

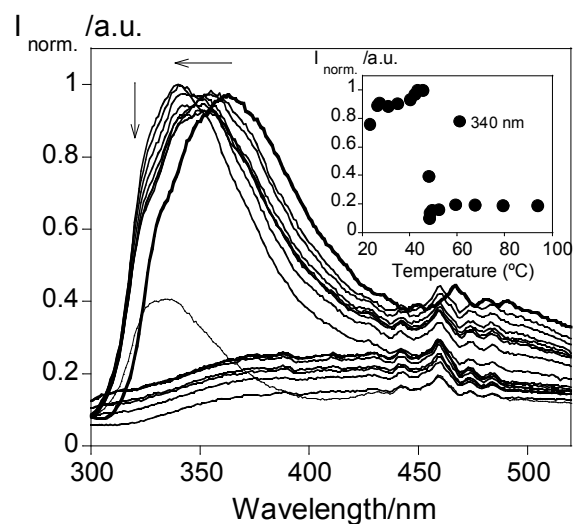

**Figure S4.** Fluorescence spectra of compound **a6** in solid state as a function of temperature (heating) in the range: 25-100°C. The inset represents the fluorescence intensity maximum of initial solid ( $\lambda = 340$  nm) on heating.

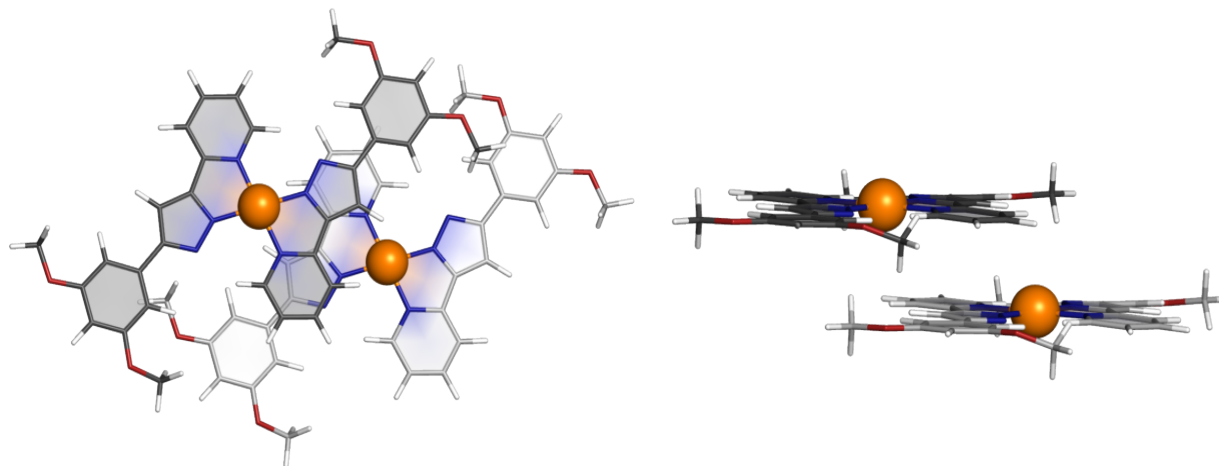

**Figure S5.** Simulated parallel-displaced conformation of platinum complexes

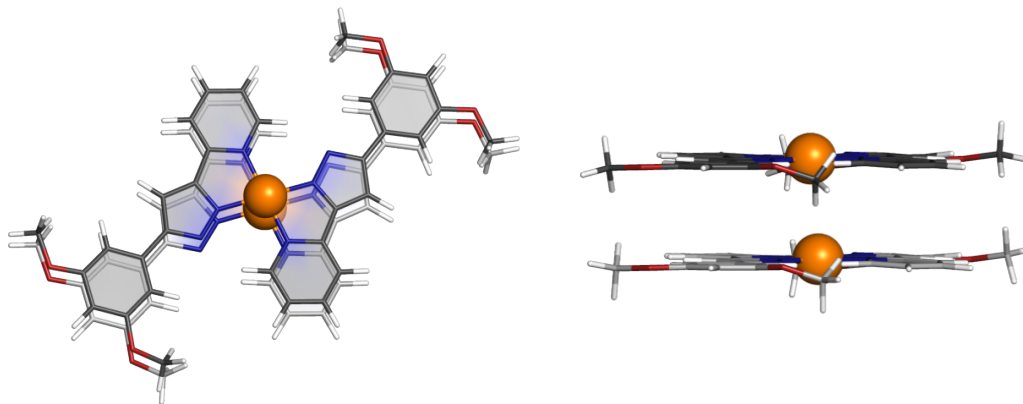

**Figure S6.** Simulated sandwich conformation of platinum complexes
